# Supplementary material
Source: Springer Nature journal article supplement (https://www.springermedizin.de/resource/supplementary/12974_2008_167_MOESM9_ESM.pdf/9600916)

**B**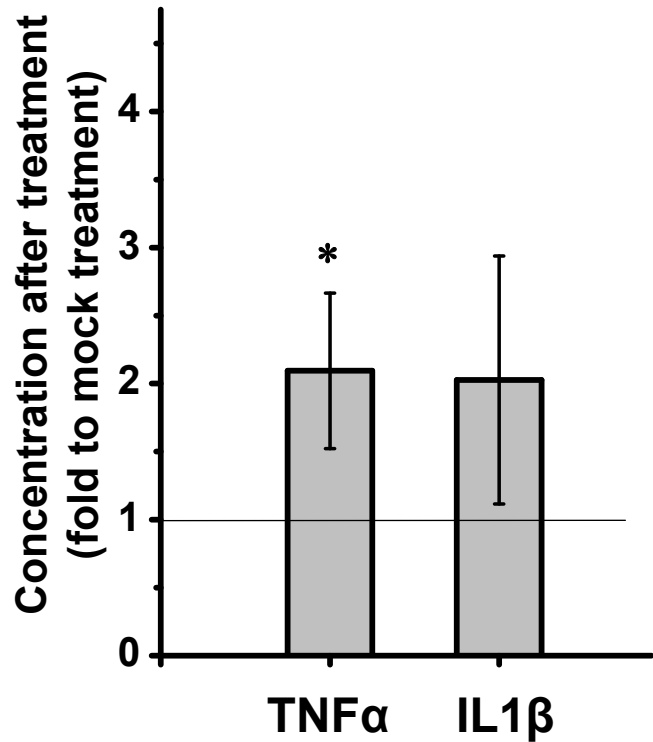**C**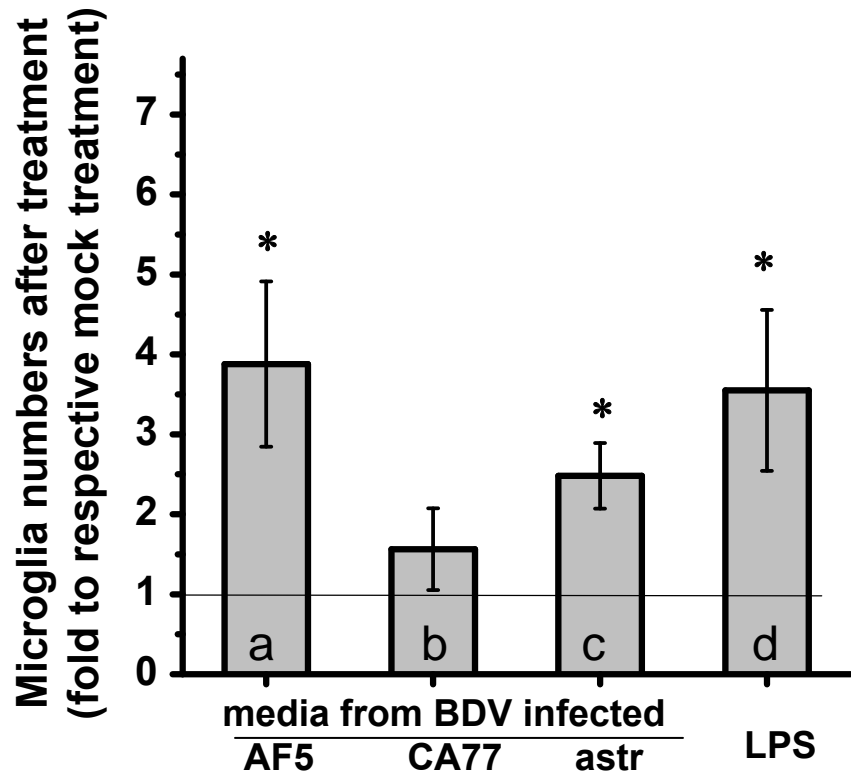

Supplement: MOESM9 [file 9600916]
